# Supplementary material for: Real Time Analysis of Bovine Viral Diarrhea Virus (BVDV) Infection and Its Dependence on Bovine CD46
Source: MDPI journal article supplement (doi:10.3390/v12010116), 2020-01-17
Supplement: s1 [file s1]

### Supplementary Figure 1

Localisation of virus particles on different parts of the cell surface at the start of the imaging period depending on the time after addition of BVDV<sub>E2-mCherry</sub> to SK6 CD46<sub>fluo</sub> (blue) or SK6 CD46<sub>fluo</sub>ΔE2bind (green) cells in %.

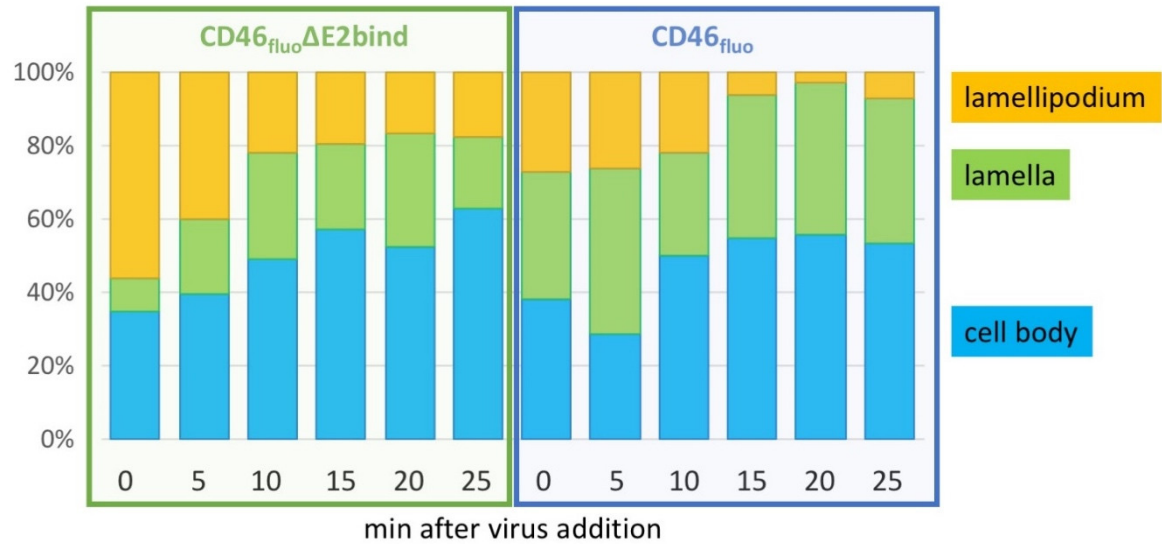

## Supplementary figure 2

Directions of movements of virus particles on SK6 CD46<sub>fluo</sub> (blue) or SK6 CD46<sub>fluo</sub>ΔE2bind (green) in %. Movement was judged with reference to the cell body, as indicated in the graph.

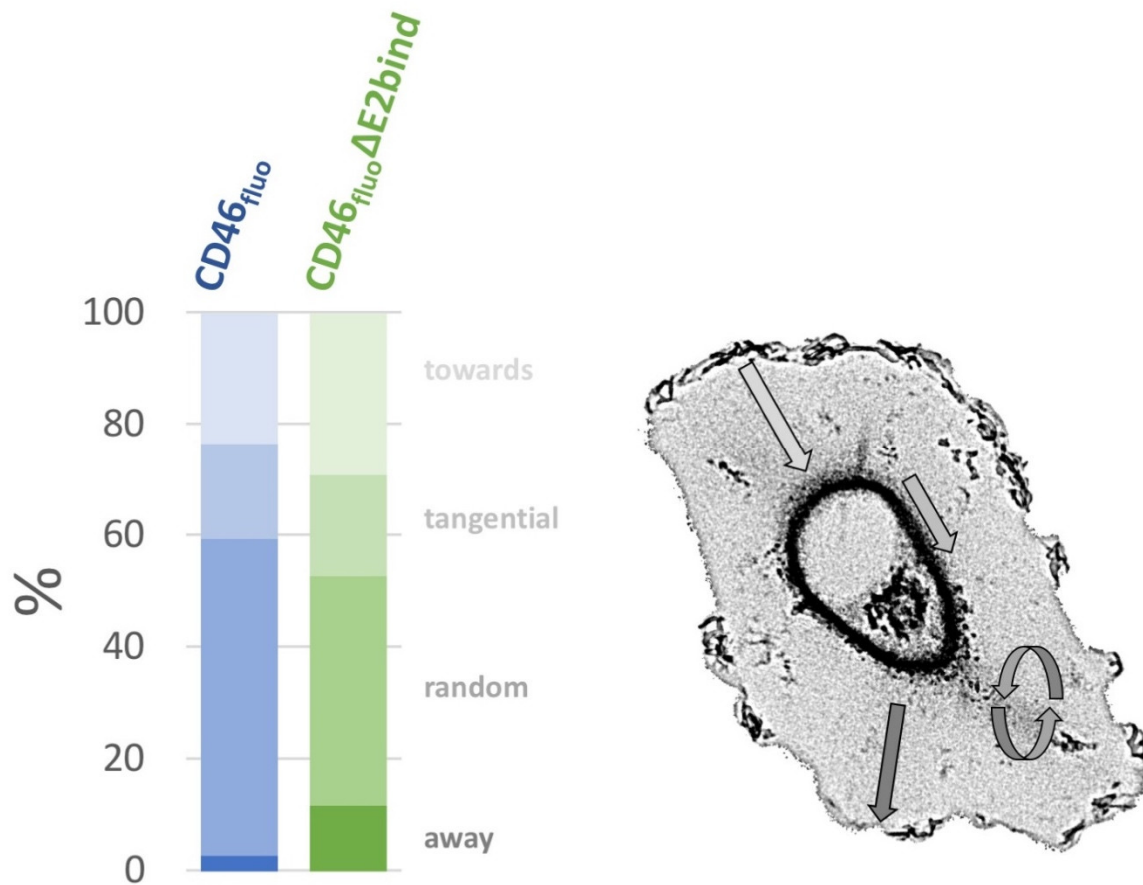

## Supplementary Information

Script for the analysis of data generated with ImageJ's manual tracking plugin.

```
#!/usr/bin/env python2
# -*- coding: utf-8 -*-
"""
Created on Tue Mar 26 08:38:17 2019

@author: christiane
"""

from itertools import groupby
import numpy as np
from sys import argv

script,infile = argv

a_file = np.loadtxt(infile, delimiter='\t', skiprows = 1, usecols = (0,1,2,3,4,5))

results = []
groups = []
for k, g in groupby(a_file, key=lambda x: x[0]):
    groups.append(list(g))

for g in groups:
    direct_distance = float((((int(g[0][2]))-(int(g[-1][2])))**2+((int(g[0][3]))-(int(g[-1][3])))**2)**0.5)*0.13
    x = (float(i[4]) for i in g)
    velocities=[]
    previousLine=[]
    for i in g:
        if len(previousLine)==0:
            previousLine=i
        else:
            velocities.append(float(i[5])/float((int(i[1])-int(previousLine[1]))))
            previousLine=i
    stdv_velocity = float(np.std(velocities))
    min_speed = min(velocities)
    max_speed = max(velocities)
    real_distance = sum(x)+1
    mean_velocity = abs(real_distance / (int(g[0][1])-int(g[-1][1]))/10)
    directionality = direct_distance/real_distance
    length = int(g[-1][1]) - int(g[0][1])

print(g[0][0],direct_distance,real_distance,directionality,mean_velocity,min_speed,max_speed, length)
```

```
results.append([g[0][0],direct_distance,real_distance,directionality,mean_velocity,stdv_velocity,min_speed,max_speed,length])
np.savetxt(infile+'_stats.txt', results , fmt = '%1.4f', delimiter='\t' , newline='\n' ,
header='track_ID\tdirect_distance\treal_distance\tdirectionality\tmean_speed\tstdv_speed\tmin_speed\tmax_speed\tlength')
```

Legends movie files:

Movie 1 and 2:

**BVDV entry events.** Single BVDV<sub>E2-mCherry</sub> particles (red, indicated by white arrow head) associated with the surface of SK TO CD46<sub>fluo</sub> cells (CD46<sub>fluo</sub> signal is shown in green) were imaged at a rate of one frame / 10s 15 or 25 min after the addition of virus, respectively. Scale bars represent 5µm and the time after start of the acquisition is shown in s in the upper left corner.

Movie 3:

**Surfing of a BVDV<sub>E2-mCherry</sub> particle on the surface of a retraction fibre.** Images were acquired at a rate of one frame / 10s. BVDV<sub>E2-mCherry</sub> signal is shown in red and the particle of interest is indicated by a white arrow head. CD46<sub>fluo</sub> signal is shown in green. For better visualization, two z-levels were merged in a maximum intensity projection. The time after start of acquisition is indicated in the upper left corner in seconds.

Movie 4 and 5:

**Development of E2-mCherry (red) signal after infection of SK6 TO CD46<sub>fluo</sub> cells with an MOI of 1 (movie 4) or 10 (movie 5).** Acquisition was started 60min after virus addition and data was acquired at a frame rate of one frame / 10min. CD46<sub>fluo</sub> signal is shown in green. The time after start of the acquisition is shown in the upper left corner in minutes.

Movie 6:

**Colocalization of E2-mCherry and CD46<sub>fluo</sub> inside the cell.** SK TO CD46<sub>fluo</sub> cells were imaged 20h after virus addition at a frame rate of one frame / 10s. CD46<sub>fluo</sub> signal is shown in green. The time after start of the acquisition is indicated in the upper left corner in seconds.

**Sequence of the plasmid encoding the full-length genome of BVDV<sub>E2-mCherry</sub>.**

5' UTR: 1-384  
Npro: 385-888  
Core: 889-1194  
Erns: 1195-1875  
E1: 1876-2460  
mCherry: 2461-3210  
E2: 3211-4329  
P7: 4330-4548  
NS2: 4549-6429  
NS3: 6430-8478  
NS4A: 8479-9042  
NS4B: 9043-9711  
NS5A: 9712-11199  
NS5B: 11200-13356  
3'UTR: 13357-13582

GTATACGAGAACTAGATGAAATACTCGTATACATATTGGGCAATAAAAAATTAATAATTAGGCCTAGGGAAACAAATCCTCCTC  
TGCGAAGGCCAAAAGGAGGCTAACCATGCCCTTAGTAGGACTAGCATAATGAGGGGGGTAGCAACAGTGGTGAGTTCGTT  
GGATGGCTTAAGCCCTGAGTACAGGGCAGTCGTCAGTGTTTCGACGCCCTTGGTTAAAAGGTCTCGAGATGCCACGTGGAC  
GAGGGCATGCCCAAAGCACATCTTAACCTGAGCGGGGGTGCCTCAGGCGAAAACAGTTTAACCAACTGCTACGAATACAG  
CCTGATAGGGTGCTGCAGAGGGCCACTGTATTGCTACTAAAAATCTCTGCTGTACATGGCACATGGAGTTGATTGCAAATG  
AACTTTTATACAAAAACATACAAAAAACCCTGTTGGGTGGAGGAACCTGTTTACGATCAGGCAGGTAATCCTTTATTTGG  
TGAAGAGTGGGGCAATCCACCCTCAATCGACGCTAAAGCTCCACACAAGAGAGGGGAACGTGACGTTCCCATCAATTTGG  
CATCTTTACCAAAAAGAGGTGATTGCAGGTCTGGTAACAGCAAAGGACCTGTGAGTGGAATCTACCTGAAGCCAGGGCCA  
CTATTCTTTCAAGACTATAAGGGTCCCGTCTATCACAGAGCCCCACTGGAGCTTTTCGAGGAGGGATTTATGTGTGAAACA  
ACTAACGGATAGGGAGAGTAAGTGGCAGTGACGGAAAGCTGTACCACATCTACGTGTGCATAGAAGGATGTATAACAGT  
GAAGATGGCCACAGAAGTCAACAAAAGGTACTTAGGTGGGTCCACAACAGGCTCAACTGTCCTCTATGGGTCAACAAGCT  
GCTCAGATACAAAAGAAGAAGGGGCAACAAAAAAGAAACAACAAAAACCCGACAGACTGGAGAAGGGGAGGCTGAAAATA  
GTGCCCAAAGAGTCTGAGAAAGACAGCAGGACTAAACCTCCGGATGCTACGATAGTGGTAGATGGGGTGAAATACCAGGT  
AAAGAAGAAGGGGAAAGTCAAGAGCAAAGCACACAGGACGGTTTATATCAATAAAAAATAAGCCGCCAGAATCACGCAA  
GAAACTTGAGAAAGCATTATTGGCATGGGCAATATTGGCTATGGTCTTGATTCAAGTTACAATGGGTGAAAACATAACACAG  
TGGAACCTACAAGATAATGGGACGGAAGGGATACAACGGGCAATGTTCCAAAGGGGGGTGAACAGAAGTCTACACGGCAT  
CTGGCCAGAGAAAATCTGTACAGGTGTCCCTTCCCATCTAGCCACCGACGTGGAACCTAAGAACAATCCATGGTATGATGGA  
TGCAAGTGAGAAGACCAACTACACGTGTTGCAGACTTCAACGCCATGAGTGGAACAAACATGGTTGGTGCAACTGGTACA  
ACATCGAACCTTGGATTTTAATCATGAATAGAACCCCACTTACTGAAGGTCAACCACTAAGAGAGTGCGCAGTCA  
CTTGCGATATGATAGGGATAGTGACCTAAATGTGGTAACACAGCTAGAGATAGCCCCACGCCATTGACAGGCTGTAAGA  
AAGGAAAAAATTTTTCTTTGCAGGCATATTGATGCGGGTCCCTGTAACCTTTGAAATAGCTGCGAGTGATGTGTTGTTCAA  
AGAACATGACTGCACAAGTGTGATTACAGGATACTGCTCATTACCTCGTAGACGGGATGACCAATTCCTTGGAAGTGCCAG  
ACAAGGGACCCGCTAAACTGACAACCTGGTTAGGCAAGCAGCTACGGATACTTGAAGGAAATTGGAACAAGAGCAAGA  
CTGGGTTTGGAGCATATGCGGCTTCCCTTACTGTGATTGTGATAAAAAAAGCTTGGCTACATATGGTATACAAAAAATTGCAC  
CCCTGCTTGCTTACCAAGAACACAAAAAATTATTGGCCCTGGGAAGTTTGATACTAACGCAGAGGATGGCAAGATATTGCA  
TGAGATGGGAGGTCACTTGTACAGAGTACTACTGCTTTCTTAGTAGTGTGTCTGATTTTGCACCAGAAACAGCTAGCGC  
AACGTATCTAATTCTACATTTTTCCATCCCACAGAGCCATGTTGACATAATGGACTGTGATAAGACCCAATTGAACCTCACT  
GTGGAGCTCACAAACAGCAGATGTAATACCGGGGTGCGTCTGGAACCTAGGAAAATATGTCTGCATAAGACCAGATTGGTG  
GCCTTATGAGACAGCTACAGTGCTGGCATTTGAAGAGGTGGGCCAGGTGATAAAGATAGTGCTGAGGGCAGTTAGAGATT  
TGACACGCATTTGGAACGCTGCCACGACCACAGCATTCTTAGTATGCCTTGTAAAGATGGTTAGGGGCCAGTTGGTACAAG  
GCATCCTATGGCTGCTACTGATAACAGGGGTGCAAGGGCACGCGCGCATGGTGAGCAAGGGCGAGGAGGATAACATGGC  
CATCATCAAGGAGTTCATGCGCTTCAAGGTGCACATGGAGGGCTCCGTGAACGGCCACAGAGTTCGAGATCGAGGGCGAG  
GGCGAGGGCCGCCCTACGAGGGCACCCAGACCGCCAAGCTGAAGGTGACCAAGGGTGCCCCCTGCCCTTCGCCTGG  
GACATCCTGTCCCCTCAGTTTATGTACGGCTCCAAGGCCTACGTGAAGCACCCCGCCGACATCCCCGACTACTTGAAGCT  
GTCCTTCCCCGAGGGCTTCAAGTGGGAGCGCGTGATGAACCTCGAGGACGGCGGCGTGGTGACCGTGACCCAGGACTC  
CTCCCTGCAGGACGCGGAGTTTCACTACAAGTGAAGCTGCGCGCACCAACTTCCCTCCGAGCCCGCTAATGCAG  
AAGAAGACCATGGCTTGGGAGGCCTCCTCCGAGCGGATGTACCCCGAGGACGGCGCCCTGAAGGGCGAGATCAAGCAG  
AGGCTGAAGCTGAAGGACGGCGGCCACTACGACGCTGAGGTCAAGACCACCTACAAGGCCAAGAAGCCCGTGACGCTGC  
CCGGCGCCTACAACGTCAACATCAAGTTGGACATCACCTCCCAACAGGAGTACACCATCGTGGAACAGTACGAACGC  
GCCGAGGGCCGCCACTCCACCGCGGCATGGACGAGCTGTACAAGCCATGGAACATCATCATCATCATCATCATCT  
AGACTGCAAACTGAATACTCATATGCCATAGCCAAGAATGATAGAGTGGCCCTACTAGGAGCTGAAGGCCCTTACCCTGT  
TTGGGAGGAATACTCACCTGAAATGACGCTGGAAGACACAATGGTCAATAGCCTCGTGACAGAGAAGGTAAGTTTACATACC  
GCTCAAGGTGCACAAGGGAAGCTAGATATCTTGCAATTTTGCATTCAAGAGCCTTACCGACCAGTGTGGTATTTGAAAAAC  
TTTTTGAGGGGCAAAAGCAAGAGGACACGGTCGAGATGGATGACAACCTTCAATTTGACTCTGCCATGCGACGCCAAG  
CCCCTAGTAAAGGGGACTTTTCAATACAACACTGCTAAATGGACCGGCTTTCCAGATGGTATGCCCATAGGGTGACAGG  
GACCGTGAGCTGTATGTTAGCTAATAGGGATACCCTAGATACAGCAGTAGTGCGGACGTATAGGAGGTATAGACCATTCC  
CTTACAGGCAAGACTGCATCACCCAAAAAGTTCTGGGGGAGGATCTCTATAACTGTATTCTTGAGGAAACTGGACCTGTA  
TAACCTGGGGACCAACTACAATACTCAGGAGGCTCTATTGAATCCTGTAAGTGGTGTGGTTTTAAATTTCAAAGAAGTGAGG  
GGTTACCAACTATCCCCATTGGCAAGTGTAGGCTGAAGAATGAGACTGGCTACAGATTAGTAGACGACACACCTCTTGCAATA  
TAGGAGGTGTGGCGATAGTACCACAGGGGATGGTAAAGTGAAGATAGGAGACACAATTGTACAGGTGATAGCTCTTGAC  
ACCAAACTTGGGCCTATGCCCTGCAAGCCATATGAGATCATTTCAAGTGAGGGGCCCGTAGAAAAGACGGCATGTACCTT  
CAACTACACGCGTACATTAAGAATAAATACTTTGAGCCCAGAGACAGTTACTTCCAGCAATATATGCTAAAAGGAGAGTAT  
CAATACTGGTTTGACCTGGAGTCACTGACCATACCGGGATTACTTCCCGAGTCCATATTAGTGGTGGTGATGCTCTC  
CTGGTGGTAGATACGTGCTCTGGTTACTGGTCACATACATGTTCTCTATCAGAACAAAAAGTCTTAGGGGCCCAATATGGG  
ACAGGGACAGTGGTGATGATGGGCAACTTACTAACACATGATAGTGTGAAGTGGTGACATATTTCTTGTGCTATACCTAC  
TGCTAAGAGAGGAGAAGCTGAAGAAGTGGGTCTTACTCTTATACCATATCTTAGTGGCACACCCATTAAATCAGTAACAGT  
GATCTTGTGATGATCGGGGATGTGGTGAAGGCTGATCCAGGGGACCAAGGGTACTTGGGGCAGATAGATGTCTGTTTCA

CAATGGTTGTA CTGATCGTCATAGGTTTGATCATAGCCAGGCGTGACCCAACTATAGTGCCACTGGTCACAATAGTTGCAT  
CACTGAGGGTCACTGGATTGACCTACGGACCTGGGTGGGATGTAGCTATGGCGGTCATGACCATAACCTTTGCTAATGGTC  
AGCTATGTCAGACGATTCACTTCAGATACAAAAGATGGCTGCAATGCTCTCAGCCTTGTATCAGGGATCTTAATGAAGA  
GCCTAATACACCTAGGTAGAAATTGAGATGCCAGGGGTGACCATCCCAAAGTGGAGACCACTAACTTTAATTCTGCTATACC  
TGATCTCAACAACAATTGTCACAATGTGGAAGGTTGACTTGGCTGGCCTATTGTTACAAGGTGTGCTATCTTATTGCTGAT  
CACAACCCTGTGGGCCGACTTCCTAACTCTTATACTGATTCTGCCACCTACGAATTGGTTAAGTTATACTACCTGAAAACT  
ATAAGACTGATGTAGAAAGAAGCTGGCTAGGGGAGTTAGACTATAAAAGAGTTAACTCCGCTACGATATTGATGAGAGT  
GGAGAGGGCGTATATCTCTTTCCATCAAAGCAGAGGGGCACAGAAAGACATCTCCATACTCTTGCCCTTGTTCAGAGCTACA  
CTGATAAGTTGTGTTAGTAATAAATGGCAGCTAATATACATGGCTTACCTAACTGTGGACTTTATGTATTACATGCACAGGA  
AGGTTATAGAAGAAATCTCAGGAGGCACCAACATGATATCCAGGTTAGTGGCAGCACTTATAGAGCTGAATTGGTCCATGG  
GAATGATACCGGTGGCTCGTTGGTACGGAGAGGGAAGTTTACGGCATGCCGAAGATCATGACTATAATAAAGGCTAGTA  
CGCTGAATAAGAACAGGCACTGCATAATATGCACTGTATGTGAAGGCCGAAAATGGAAAGGTGGCACCTGCCCAAAATGC  
GGACGCCATGGAAAACCCATAACATGTGGGATGTCACTAGCAGATTTTGAAGAAAGGCATTACAAAAGGATCTTTATAAGG  
GAAGGCATTGTGACGAACCTGAAAGACGGAAGGAATATGAGATGAAACGAATGGCAGAAAATGAGCTGAGCCGGTCAGT  
GAATGATGTTCCGTGCTGCAAGAGCTGCAAGAAGCAATGACATGATGTGCAGCCGATGCCAGGCAAGCATGAAAGGTTT  
AAATGGACCGGGAACCTAAGAGTGCCAGATACTGTGCTGAGTGTAAAGGCTGCATCCTGCTGAGGAAGGTGACTTTTGG  
GCAGAGTCAAGCATGTTGGGCCTCAAAATCACCTACTTTGCGCTGATGGATGGAAGGTGTATGATATCACAGAGTGGGC  
TGGATGCCAGCGTGTGGGAATCTCCCCAGATACCCACAGAGTCCCTTATCACATCCCATTTGGTTCACGGATGCCAGGCA  
CCAGTGGGCGGCAGAGAGCTACTCCAGATGCCCTCCTGCTCAGGATTCTTGAGCCGATCTTTGAGCCAGCTACCC  
CCAGGCCAGATGTCCAACGGGAACCTTCTTTCAGCTCCTCAGCCCGGCCCTGGGGCCAACTTTGACGGCCCTTTTCAGACA  
AGAATATAATGGTTTTATACAATATACCGCTAGGGGGCAGTTATTTTTAAGAAACCTGCCCATACTGGCAACTAAAGTAAAA  
ATGCTCATGGTAGGCAACCTCGGAGAAAGAAATCGGGGACCTGGAACACCTTGGGTGGATCCTAAGGGGGCCTGCCGTGT  
GCAAGAAGATCACAGAACATGAAAGATGCCACGTCAACATATTAGACAAGTTAACTGCATTTTTCGGGATCATGCCAGGG  
GGACTACACCCAGAGTCCAGTGAGGTTCCCTACGAGTTTATTAAGAGTGAGGAGGGGTCTGGAGAGTGGTGGGCTTAT  
ACACACCAAGGTGGGATAAGTTCCGTCGATCATGTAACCGCTGGCAAAGATCTATTGGTCTGTGACAGCATGGGGAGAAC  
TAGAGTGGTCTGCCAGAGCAACAACAAGTTAACTGATGAGACAGAGTATGGTGTCAAGACTGATTACGGATGCCCAGATG  
GTGCCAGATGTTACGTGCTGAATCCAGAGGCACTCAACATATCAGGTTCCAAAGGGGCAGTCGTCCACCTCCAAAAACA  
GGTGGGGAATTCAGTGTGTCACGTGCATCAGGCACGCGGCTTTCTTTGATCTAAAAAACTTGAAGAGATGGTGGGCT  
GCCCATATTTGAAGCCTCCAGTGGAAAGGTTAGTTGGCAGGGTTAAAGTAGGGAAGAATGAGGAGTCTAAACCTACAAAGA  
TAATGAGTGGTATCCAGACCGTCTCAAAGAACACAGCAGATCTTACTGAAATGGTCAAGAAAAATCACCAGTATGAACAGGG  
GAGACTTCAAGCAGATACTTTAGCAACAGGGGCGGAAAACTACAGAACTCCAAAAGCGGTGATAGAGGAGATAGGA  
AGACACAAGCTGATGTTACTCTTATACCGTTGAGGGCAGCGCAGTCACTACCAGTACATGATGATGAATGAACACCC  
GAGTATATCCTTCAACCTAAGGATAGGGGACATGAAAGAAGGAGACATGGCAACAGGGATAACTTATGCATCATACGGGTA  
CTTCTGCCAGATGCCTCAGCCAAAGCTTAGAGCAGCCATGGTGAATACTCTTACATATTCTTAGATGAATACCATTGCGCC  
ACTCCTGAACAACCTGGCAATTATCGGAAAAATCCACAGATTTTCAGAGAGCATAAGAGTGGTTGCCATGACTGCCACCCCA  
GCAGGGTCAGTAACCAACGGGACAAAAACCCCAATAGAGGAATTCATAGCCCCGAGGTGATGAAGGGGAAGACCT  
AGGCAGCCAAATTCCTGATATAGCGGGGCTAAAAATTCCTGGTGGATGAGATGAAAGGCCAACATGCTGGTTTTGTACCCAC  
GAGAAACATGGCAGTTGAGGTGGCGAAGAAGTTAAAGCTAAGGGCTACAATTCTGGGTACTACTATAGTGGAGAGGATC  
CAGCTAATCTGAGAGTTGTAAACATCACAGTCCCTTATGTAATTGTGGCAACGAACGCCATTGAATCAGGAGTGACATTAC  
CAGACTTGGACACGGTCTGTGGACACAGGGTTGAAATGTGAAAGAGGGTGAGGGTATCATCAAGATACCCCTTCATCGTA  
ACAGGCCCTTAAGAGCTGCCGTCACTGTGGGTGAACAGTTAGAGTCCAGGTCCCGGCTCTGTTCCCAAAAAATAGGAACGGAGAG  
GATATTACAGGAGCCAGGAAACAGCAACCGGGTCAAGGACTACCACTATGACCTCTTGACGGCACAAGATACGGCATT  
GAGGACGGAAATTAATGTAACAAAATCCTTTAGGGAAATGAATTATGATTGGAGCCTATACGAGGAGGACAGCCTGCTAATA  
ACCCAGTTAGAAATATTAATAATTTACTCATATCAGAAGACTTGCCAGCCGCTGTCAAGAACATAATGGCCAGGAGTGATC  
ACCCAGAGCCGATCCCACTTGCTTACAACAGTTATGAGGTCCAGGTCCCGGCTCTGTTCCCAAAAAATAGGAACGGAGAG  
GTCACAGACACCTACGAAACTACTCATTTCTAAACGCTAGAAAGTTAGGAGAGGATGTGCCCCGTATACATCTATGCCACT  
GAAGATGAGGACCTGGCAGTTGACCTCCTAGGGCTAGACTGGCCTGACCCTGGGAATCAGCAGGTCTGGAGACCAGCA  
AAGCACTGAAACAAGTGGCTGGGTTGCTTTCAGCTGAGAATGCCTTGCTCATAGCTTTATTTGGGTATGTAGGTTACCAAG  
GTCTGTCAAAGAGGCTGTTCCAAATGATCAGAGATATACACTATAGAGGACCAGAGACTGAAGACACCACTCCCTCC  
AGTATGCACCCAACGCCATAAAAAACCGAGGGGACTGAGACTGAATTGAAGGAATTGGCGGGGGGTGACGTGGAAAAAATC  
ATGGGAGCCATCTCGGATTATGCAGCTGGAGGACTGGAATTTGTAATACTCAAGCAGAAAAAGTGAAGACAGCCCTTTG  
TTTAAGGAAAACGTAGAAGCTGCAAAAGGGGTACGTCCAAAACTAATTGACTCATTAATTGAAGATAAAGATGTAATAATCA  
GATATGGCTTGTGGGAACATACAGCACTCTATAAAGCAGTAGCTGCAAGACTGGGGCATGAAACAGCATTTGTCTACAC  
TAGTAATAAAGTGGCTAGCCCTTCGGAGGGGAGTCCGTGTGACACCATGTCAGACAGGCGGCTGTTGATTAGTGGTCTAT  
TATGTGATGAACAAGCCTTCTTCCAGGTGATTCTGAAACCCAGCAAGAAGGGAGGCGGTTTGTGCGAAGCCTGTTTCATC  
TCCGCTTGGCAACTTACACATACAAAACCTGGAATTATCACAATCTCTCAAAGTGGTGAACACAGCCCTGGCATACCTC  
CCTTATGCCACCAGCGCATTAATAATGTTACCCCAACGAGACTGGAAGCGTGGTGATACTGAGCACTACAATATACAAA  
ACATACCCTCTCTATAAGGAAAAGGGAAGAGTGTGATTGCTGGGTACGGGGATCAGTGCAGCCATGGAGATCCTGTCCACA  
AAACCCGGCATCGGTAGGTATATCCGTGATGCTGGGGGTAGGTGCTATCGCTGCGCATAACGCCATTGAATCCAGCGAGC  
AGAAAAGGACCCCTACTTATGAAGGTGTTTGTAAAGAATTTCTTGGATCAGGCTGCAACGGATGAGCTGGTTAAAGAAAACC  
CGGAAAAGATCATAATGGCTTTATTTGAAGCAGTCCAGACGATTGGCAACCCCTTAAGGTTGATATACCACCTGTATGGAG  
TTTACTACAAGGGCTGGGAGGCCAAGGAGCTATCTGAGAGGACAGCAGGTAGAAACTTATTCACACTGATAATGTTTCGAAG  
CCTTCGAATTGTTAGGGATGGATTGAGAAGGGAAGATAAGGAACCTATCTGGAACTACATCTTAGATTTGATCTATGGATT  
GCATAGGCAGATCAACAGAGGGCTAAAGAAGATAGTACTGGGGTGGGCCCTGCGCCCTTCAGCTGTGACTGGAATCCT  
GGCGATGAGAGGATCAGGTTGCCAACGGACAACATTTAAGAGTGGAAACCAAGGTGCCCGTGTGGCTATCAGATGAAAGC  
TATCAAAAATGTAGATGTTAAGCTTAACAGGTGGAGGAGAGGACCTTTTCTATGTAGGAACAGACCTGTAGGGGGC  
CAGTCAACTACAGAGTTACCAAGTACTATGATGACAATCTCAAAGAGATAAAGCCAGTGGCAAAGTTAGAAGGACAGGTGG  
AGCACTACTACAAAGGGGTACGGCAAAAATTGACTACAGTAAAGGGAAAATGCTTTTGGCTACTGATAAATGGGAGGTGG  
AACATGGTACAATAACCAAGTTGGCTAAGAGATATACTGGGGTGGGTTCAATGGCGCATACCTAGGCGACCAGCCCAAC  
CACCGTGACCTAGTGAGAGGGGATTGTGCAACTATAACAAAAACAGTGCAGTTTCTAAAGATGAAGAAGGGGTGTGC  
ATTTACCTATGATCTAACCATCTCCAATTTGACCAGGCTCATGAACTGTTTACAGAAACAACTTGAAGAGAAGGAAATA  
CCCACCGCCACGGTCACTACGTGGCTAGCTTACACCTTCGTGAACGTAGACGTGGGGACCATAAAACCGGTGCTAGGGG  
AGAGAGTAATCCCCGATCCTGTAGTTGATGTCAACTTACAACAGAGATCCAAGTGATACATCAGAGGTTGGGATCACAA  
TAATTGGAGGGGGAGCCTTGATGACAACAGGAGTGACACCCGTTGTGGAAAAGATAGAGCCTGATGCTGACGGCAACCAA

AAC TCGGTGAAGGTCGGGCTGGATGAAGGTAATTATCCAGGGCCTGGTGTACAAACACACACTAGTAGAAGAAATACA  
CAACAGGGGACGCAAGACCCCTCATTCTGGTCTAGGCTCAAAGAGTTCCATGTCAAATAGAGCAAAGACAGCTAAAAATAT  
AAACCTGTATACAGGATGACCCAGGGAGATGAAGAGACTTGATGGCAGAAGGACGCTTGTAGTAGTGGCATTGAGGC  
ACATCGACCCGTGATCTACTTGAAC TAGTTGACTTCAAGGGGACCTTTTATAGTAGGGAAACCTTGGAGGCTTTGAGTCTTG  
GGCAGCCCAGACCCAAGCGGGTTACCAAAGCAGTAATTAGGGAATTATTGAAAGAGGAAAGGCAAGTGGAGATCCCTAAC  
TGGTTTACATCAGATGATCCGGTATTCTTGGAGTAGCCATGAATAAAAAATAAGTACCACTTAGTGGGAGATGTAGGAGAG  
GTGAAAGACCGAGCTAAGGCACCTGGGGCTACGGATCAGACAAGAATAATAAAGGAGGTAGGCTCAAGGACATATACCAT  
GAAGTTGTCTAGCTGGTTTCTACAAGCGTCAAACAAACAGATGAGTCTAACTCCACTGTTTGAAGAACTGCTGCTACCATG  
CCCCCTGCAACTAAGAGCAATAAGGGACATATGGCATCAGCTTACCAATTGGCACAGGGCAATTGGGAGCCCCTCGGTT  
GTGGGGTGCATCTAGGTACCATACCAGCCAGAAGAGTGAAGATACATCCATACGAAGCTTATCTGAAGCTGAAAGACCTC  
GTAGAAGAAGAGGAAAAAGAAGCCAAGGATTAGGGATACAGTAATAAGGGAGCACAACAATGGATACTTAGAAAAATAAAA  
TTCCAAAGGACCTCAAGACTAAGAAAAATGCTCAACCCCTGGAAACCTGTTCTGAACAGCTGGACAGAGAGGGGCACAAAAG  
AAACATCTATAATAACCAGATCAGTACCATAATGTCTAGTGCAGGCATACGGCTGGAAAAAGTTGCCAATAGTGAGGGCCCA  
AACCAGACTAAGAGCTTCCATGAGGCAATAAGGGATAAGATAGACAAGAATGAGAACC GGCAAAATCCAGAATTGCACAA  
CAAATTGTTGGAATTTTTTACACAATAGCCAACCCACCTACAACACACCTACGGTGAGGTAACTGAGGGAGCAACTTGA  
GGCAGGAATAAATAGGAAAGGGCAGCAGGCTTCCCTACAGTAAGCAACACATCGGGGAAGTATGAGGAAGTACGCTACCATG  
TGGTAGAACAAATTGATCAGGGATATGAAGGCCGGGAGAAAGATAAGGTATTATGAAACAGCAATACCAAAAAATGAGAAGA  
GAGATGTTAGTGACGACTGGCAAGCCGGGGACCTGGTAGATGAGAAGAAGCCAAGAGTCATCCAATACCCTGAAGCCAA  
GACAAGGTTAGCCACTACTAAGGTCATGTATAACTGGGTAAAACAGCAACCCGTTGTGATCCCAGGATACGAAGGGAAGA  
CCCCCTTGTTCACATCTTAAATAAGTGAGGAAGGAATGGGAACTGTTCAATGAGCCAGTGGCGTATTTTATACCA  
AAGCTTGGGATACCAAGTGACTAGTAGGGATCTACAACCTATTGGAGACATCCAGAAATACTACTACAGGAAGGAATGGC  
ACAAGTTCATTGACACCATCACTGACCACATGGTAGAAGTGCCAGTAATAACAGCTGATGGTGAAGTATATATAAGAAATG  
GGCAGAGGGGGAGTGGCCAGCCAGACACAAGTGCAGGCAACAGTATGTTAAATGTCCTGACAATGATGTATGCTTTCTGC  
GAAAGCACAGGGTCCCGTACAAGAGTTTCAACAGGGTGCCAAAGGATCCATGTCTGTGGGACGATGGCTTCTTAATAAC  
TGAAAAAGCTTAGGTTAGTTTGAACAGGGTGCCTTACAGTCCCTTACGAAAGCAGGCAAGCCCAAGAAAAATAACGG  
AAGGGGAAAAAATGAAAGTTGCCTATAGATTTGAAGACATAGAATTTTGTCTACATACCCAGTCCCTGTTAGGTGGTCTGA  
TAACACCAGTAGTTACATGGCCGGCAGAGACACTGCCGTGATACTATCAAAGATGGCAACAAGATTGGATTCAAGCGGGG  
AGAGGGGTACACGGCATGTGAAAAAGCAGTGGCTTTTCAGCTTCTTACTAATGTACTCCTGGAACCCGCTTGTAGGAGG  
ATTTGCTTATGGTCTTTTCGAGCGACCAAGAAATAGCTCCATCAACACAGACCACTTATTACTACAAAGAGATCCAATAG  
GGGCTATAAAGATGTAATAGGCCGGAATCTAAGTGAAC TAAAGAGAACAGGCTTCGAGAAATTTGGCAAATCTAAATCTGA  
GTCTGTCCACGCTAGGGATCTGGACCAACATACAAGCAAAAGAATAATTCAGGACTGCGTGGCCATTGGAAGGAAGAA  
GGAAATTTGGCTGGTAAATGCCGACAGGTTGATATCCAGCAAACTGGCTACTTATACATACCTGACAAAGGTTTTACAATAC  
AAGAAAGCATTATGAGCAACTGCAACTAGGAGCGCGCAGCAACCCGTTATGGGTGTCGGGATGACCAAGTATCAAGTTA  
GGTCCCATAGTCAATCTGCTATTGAGAAGGTTGAAGGTCTGCTCATGGCGGCTGTGCGCGCCAGCGGCTGAAACAAATG  
TATATACTATAAATAAATTGACCCTTGATCATATTGTATATAAATATAGTTGGGATCGTCTACCTGAAAAAGACAATACCCC  
AACATTAACAGCTAAATAGTGGTTGAGATTATCTACCTCAAGATAACACTACACTCAATGCACATAGCACTTTAGCTGTATGA  
GGATATGCCGACGCTACAGTTGGACTAGGGAAGACCTCTAACAGCCCCGGCGGATCCTTGATTAACTACCTCACTAA  
CGTTCCAAAAGGGAACCTTTACAGCCACTTTAGAAGAAATGGCAGCGGAACACGAGGACATTATGAAGGCCATTAATTTAC  
ATCCACAGTATCTGACCCTTTCGCCAGCAAAGTGAATACATGCTGGGCTAAAGCTATTATACCCATCCTAAGAACGGCAGG  
GATAGAACTTACATTGAGCAGTGGGAAGATCGCTTATCGCGATACCGTCGAGGGGAATTAATTCCTTGAAGACGAAAGGG  
CCAGGTGGCACTTTTCGGGGAAATGTGCGCGGAACCCCTATTTGTTATTTTCTAAATACATTCAAATATGTATCCGCTCA  
TGAGACTAATCAACGCTGCTTCAATAATATTGAAAGAGTAAAGAGTATGAGTATTCAACATTTCCGTGTGCGCCCTATT  
CCCTTTTTTTCGGGCATTTTGCTTCCCTGTTTTTGTCTACCCAGAAACGCTGGTGAAAGTAAAGATGCTGAAGATCAGTTGG  
GTGCACGAGTGGGTTACATCGAAGTGGATCTCAACAGCGGTAAGATCCTTGAGAGTTTTTCGCCCCGAAGAAGCTTTTCCAA  
TGATGAGCACTTTTAAAGTTCTGCTATGTGGCGGCTATTATCCCGTGTGACGCGGGGCAAGAGCAACTCGGTCGCGCG  
ATACACTATTCTCAGAAATGATTGGTTGAGTACTACCAAGTACAGAGAAAGCATCTTACGGACACCAAGTACAGAAAAGCAT  
CTTACGGATGGCATGACAGTAAGAGAATTATGCAGTGCTGCCATAACCATGAGTGATAACACTGCGGCCAACTTACTTCTG  
ACAACGATCGGAGGACCGAAGGAGCTAACCCTTTTTTGCACAACATGGGGGATCATGTAACCTCGCCTTGATCGTTGGGA  
ACCGGAGCTGAATGAAGCCATACCAACGACGAGCGTGACACCAAGTGCCTGTCAGCAATGGCAACAACGTTGCGCAAA  
CTATTAGTGGCGAATCTACTCTAGCTTCCCGCAACAATTAAAGACTGGATGGAGGCGGATGAAGGCTTGGAGCA  
CTTCTGCGCTCGGCCCTTCGGCTGGCTGGTTTATTGCTGATAAATCTGGAGCCGGTGAGCGTGGGTCTCGCGGTATCAT  
TGCAGCACTGGGGCCAGATGGTAAGCCCTCCCGTATCGTAGTTATCTACACGACGGGGAGTCAGGCAACTATGGATGAAC  
GAAATAGACAGATCGCTGAGATAGGTGCCTCACTGATTAAGCATTGGTAACTGTCAGACCAAGTTTACTCATATATACTTTA  
GATTGATTTAAAACTCATTTTTAATTTAAAGGATCTAGATCCTTTTTGATAATCTCATGACCAAAATCCCTTAACGTGAGTT  
TTGTTCCACTGAGCGTACAGCCCGTAGAAAAAGATCAAAGGATCTTCTTGAGATCCTTTTTTCTGCGCGTAATCTGCTGC  
TTGCAAAACAAAAAACACCGCTACCAGCGGTGGTTTGTGGCGGATCAAGAGCTACCAACTCTTTTTCCGAAGGTAAC  
GGCTTCAGCAGAGCGCAGATACCAAATACTGTCTTCTAGTGTAGCCGTAGTTAGGCCACCACTTCAAGAACTCTGTAGCA  
CCGCCTACATACCTCGCTCTGCTAATCCTGTTACCAAGTGGCTGCTGCCAGTGGCGATAAGTCTGTCTTACCGGGTTGGA  
CTCAAGACGATAGTTACCGGATAAGGCGCAGCGGTCGGGCTGAACGGGGGTTCTGTCACATGTTCTTCTGCTTATCCCTGATT  
TGTGGATAACCGTATTACCGCTTTGAGTGAGCTGATACCGCTCGCCGACGCCGAACGACCGAGCGCAGCGAGTCACTG  
AGCGAGGAAGCGGAAGAGCGCCTGATGCGGTATTTTCTCCTTACGCATCTGTGCGGTATTTACACCCGCATATGGTGCAC  
TCTCAGTACAATCTGCTGTGATGCCGCATAGTTAAGCCAGTATACACTCCGCTATCGCTACGTGAGTGGGTCTAGGCTGCG  
CCCCGACCCCGCAACCCGCTGACGCGCCCTGACGGGCTGTCTGCTCCCGGCATCCGCTTACAGACAGCCAGCTGGAGTGA  
CCGTCTCCGGGAGCTGCATGTGTGAGAGGTTTTACCGTCTATACCGAAACGCGCGAGGCAGCTGCGGTAAGCTCATCA  
GCGTGGTCTGAAGCGATTACAGATGTCTGCCTGTTTCATCCGCTCCAGCTCGTTGAGTTTCTCCAGAAGCGTTAATGTC  
TGGCTTCTGATAAAGCGGGCCATGTTAAGGGCGGTTTTTCTGTTTGGTCACTGATGCCTCCGTGTAAGGGGGGATTTCTG  
TTCATGGGGTAATGATACCGATGAAACGAGAGAGGATGCTCCAGTACGGGTTACTGATGATGAACATGCCCGGTTACT  
GGAACGTTGTGAGGGTAAACCAACTGGCGGTATGGATGGCGCGGATTTAGGTGACACTATA
